# Supplementary material for: Identification of patients undergoing chronic kidney replacement therapy in primary and secondary care data: validation study based on OpenSAFELY and UK Renal Registry
Source: PubMed Central journal article supplement (PMC11029353; doi:10.1136/bmjmed-2023-000807), 2024-04-18

# Supplementary information

## S1 Codelists

### **S1A Primary care codelists**

Existing codelists published on opencodelists.org

KRT <https://www.opencodelists.org/codelist/opensafely/renal-replacement-therapy/2020-04-14/>

Dialysis

<https://www.opencodelists.org/codelist/opensafely/dialysis/3ce108ac/>

Transplant

<https://www.opencodelists.org/codelist/opensafely/kidney-transplant/2020-07-15/>

CKD

<https://www.opencodelists.org/codelist/primis-covid19-vacc-uptake/ckd15/v.1.5.3/>

<https://www.opencodelists.org/codelist/opensafely/chronic-kidney-disease-snomed/2020-04-14/>

**Table S1B - Secondary care codelists**

| Modality | Coding system | Code   | Description                                                                                                                                                                          |
|----------|---------------|--------|--------------------------------------------------------------------------------------------------------------------------------------------------------------------------------------|
| Dialysis | ICD-10        | T824   | Mechanical complication of vascular dialysis catheter                                                                                                                                |
|          |               | Y602   | Unintentional cut/puncture/perforation or haemorrhage during surgical and medical care - during dialysis or other perfusion                                                          |
|          |               | Y612   | Foreign object accidentally left in body during medical care - during kidney dialysis or other perfusion                                                                             |
|          |               | Y622   | Failure of sterile precautions during surgical or medical care- during kidney dialysis or other perfusion                                                                            |
|          |               | Y841   | Other medical procedures as the cause of abnormal reactions of the patient, or of later complication, without mention of misadventure at the time of the procedure - kidney dialysis |
|          |               | Z49    | Care involving dialysis                                                                                                                                                              |
|          |               | Z49.31 | Encounter for adequacy testing for haemodialysis                                                                                                                                     |
|          |               | Z49.32 | Encounter for adequacy testing for peritoneal dialysis                                                                                                                               |
|          |               | Z491   | Extracorporeal dialysis                                                                                                                                                              |
|          |               | Z492   | Other dialysis                                                                                                                                                                       |
|          |               | Z493   | Encounter for adequacy testing for dialysis                                                                                                                                          |
|          |               | Z992   | Dependence on renal dialysis                                                                                                                                                         |
| Dialysis | OPCS-4        | X40    | Dialysis NEC                                                                                                                                                                         |
|          |               | X401   | Renal dialysis                                                                                                                                                                       |
|          |               | X402   | Peritoneal dialysis NEC                                                                                                                                                              |
|          |               | X403   | Haemodialysis NEC                                                                                                                                                                    |
|          |               | X405   | Automated peritoneal dialysis                                                                                                                                                        |
|          |               | X406   | Continuous ambulatory peritoneal dialysis                                                                                                                                            |
|          |               | X408   | Other specified compensation for renal failure                                                                                                                                       |
|          |               | X409   | Unspecified compensation for renal failure                                                                                                                                           |
|          |               | X41    | Placement of ambulatory apparatus for compensation for renal failure                                                                                                                 |
|          |               | X411   | Insertion of ambulatory peritoneal dialysis catheter                                                                                                                                 |

| Modality        | Coding system                                                       | Code | Description                                                             |
|-----------------|---------------------------------------------------------------------|------|-------------------------------------------------------------------------|
|                 |                                                                     | X418 | Other specified                                                         |
|                 |                                                                     | X419 | Unspecified                                                             |
|                 |                                                                     | X42  | Placement of other apparatus for compensation for renal failure         |
|                 |                                                                     | X421 | Insertion of temporary peritoneal dialysis catheter                     |
|                 |                                                                     | X428 | Other specified                                                         |
|                 |                                                                     | X429 | Unspecified                                                             |
| Transplant      | ICD-10                                                              | Z940 | Kidney transplant status                                                |
| Transplant      | OPCS-4                                                              | M01  | Transplantation of kidney                                               |
|                 |                                                                     | M012 | Allotransplantation of kidney from live donor                           |
|                 |                                                                     | M013 | Allotransplantation of kidney from cadaver NEC                          |
|                 |                                                                     | M014 | Allotransplantation of kidney from cadaver heart beating                |
|                 |                                                                     | M015 | Allotransplantation of kidney from cadaver heart non-beating            |
|                 |                                                                     | M018 | Other specified transplantation of kidney                               |
|                 |                                                                     | M019 | Unspecified transplantation of kidney                                   |
|                 |                                                                     | M084 | Exploration of transplanted kidney                                      |
|                 |                                                                     | M17  | Interventions associated with transplantation of kidney                 |
|                 |                                                                     | M174 | Post-transplantation of kidney examination - recipient                  |
|                 |                                                                     | M178 | Other specified interventions associated with transplantation of kidney |
| M179            | Unspecified interventions associated with transplantation of kidney |      |                                                                         |
| Additional KRT* | ICD-10                                                              | T861 | Kidney transplant failure and rejection                                 |
| Additional KRT* | OPCS-4                                                              | M023 | Bilateral nephrectomy                                                   |
|                 |                                                                     | M026 | Excision of rejected transplanted kidney                                |
|                 |                                                                     | M027 | Excision of transplanted kidney NEC                                     |

| Modality | Coding system | Code | Description                                        |
|----------|---------------|------|----------------------------------------------------|
|          |               | X412 | Removal of ambulatory peritoneal dialysis catheter |

\* Secondary care KRT ICD-10 and OPCS-4 codelists include the codes from the corresponding dialysis and transplant codelists, plus the additional codes listed here

Table S2 – Comparative UKRR data for the whole of England

|                    | Receiving KRT at start of 2020 | Receiving dialysis at start of 2020 | Receiving transplant at start of 2020 | Receiving KRT during 2020 |
|--------------------|--------------------------------|-------------------------------------|---------------------------------------|---------------------------|
|                    | N (%)                          | N (%)                               | N (%)                                 | N (%)                     |
| Total              | 57,545                         | 25,157                              | 32,388                                | 6,283                     |
| Age                |                                |                                     |                                       |                           |
| 18-39              | 7,458 (13)                     | 2,045 (8)                           | 5,413 (17)                            | 692 (11)                  |
| 40-49              | 8,265 (14)                     | 2,393 (10)                          | 5,872 (18)                            | 669 (11)                  |
| 50-59              | 13,597 (24)                    | 4,600 (18)                          | 8,997 (28)                            | 1,255 (20)                |
| 60-69              | 13,062 (23)                    | 5,566 (22)                          | 7,496 (23)                            | 1,448 (23)                |
| 70-79              | 10,531 (18)                    | 6,419 (26)                          | 4,112 (13)                            | 1,538 (24)                |
| 80+                | 4,632 (8)                      | 4,134 (16)                          | 498 (2)                               | 681 (11)                  |
| Median (IQR)       | 60 (49,71)                     | 66 (55,77)                          | 56 (45,65)                            | 64 (52,74)                |
| Sex                |                                |                                     |                                       |                           |
| Male               | 22,268 (39)                    | 9,581 (38)                          | 12,687 (39)                           | 2,217 (35)                |
| Female             | 35,277 (61)                    | 15,576 (62)                         | 19,701 (61)                           | 4,066 (65)                |
| Ethnicity          |                                |                                     |                                       |                           |
| Asian              | 8,235 (14)                     | 3,763 (15)                          | 4,472 (14)                            | 860 (14)                  |
| Black              | 5,056 (9)                      | 2,936 (12)                          | 2,120 (7)                             | 493 (8)                   |
| Mixed              | 824 (1)                        | 393 (2)                             | 431 (1)                               | 85 (1)                    |
| Other              | 1,075 (2)                      | 506 (2)                             | 569 (2)                               | 120 (2)                   |
| White              | 41,389 (72)                    | 16,873 (67)                         | 24,516 (76)                           | 4,219 (67)                |
| Missing            | 966(2)                         | 68 86 (3)                           | 280(1)                                | 506 (8)                   |
| IMD quintile       |                                |                                     |                                       |                           |
| 1 - most deprived  | 13,685 (24)                    | 7,065 (28)                          | 6,620 (20)                            | 1,562 (25)                |
| 2                  | 12,956 (23)                    | 6,002 (24)                          | 6,954 (21)                            | 1,419 (23)                |
| 3                  | 11,447 (20)                    | 4,872 (19)                          | 6,575 (20)                            | 1,227 (20)                |
| 4                  | 10,240 (18)                    | 3,963 (16)                          | 6,277 (19)                            | 1,125 (18)                |
| 5 - least deprived | 9,153 (16)                     | 3,233 (13)                          | 5,920 (18)                            | 945 (15)                  |
| Missing            | 64(0)                          | 22(0)                               | 42(0)                                 | 5 (0)                     |
| Region             |                                |                                     |                                       |                           |

|                    |             |            |            |            |
|--------------------|-------------|------------|------------|------------|
| East of England    | 4,653 (8)   | 2,139 (9)  | 2,514 (8)  | 577 (9)    |
| London             | 14,818 (26) | 6,557 (26) | 8,261 (26) | 1,490 (24) |
| Midlands           | 11,053 (19) | 5,392 (21) | 5,661 (17) | 1,307 (21) |
| North East         | 2,996 (5)   | 1,238 (5)  | 1,758 (5)  | 323 (5)    |
| North West         | 6,474 (11)  | 2,632 (10) | 3,842 (12) | 661 (11)   |
| South East         | 6,914 (12)  | 2,674 (11) | 4,240 (13) | 805 (13)   |
| South West         | 4,861 (8)   | 2,058 (8)  | 2,803 (9)  | 514 (8)    |
| Yorkshire & Humber | 5,776 (10)  | 2,467 (10) | 3,309 (10) | 606 (10)   |

**Table S3** - Characteristics of the study population by data source and modality. All n rounded to the nearest 5. For primary and secondary care total KRT may exceed the sum of dialysis and transplant as some KRT codes do not indicate modality.

|                     | KRT recipient at start of 2020 |             |             | Dialysis recipient at start of 2020 |             |             | Transplant recipient at start of 2020 |             |             | Starting KRT during 2020 |            |            |
|---------------------|--------------------------------|-------------|-------------|-------------------------------------|-------------|-------------|---------------------------------------|-------------|-------------|--------------------------|------------|------------|
|                     | UKRR                           | PC          | SC          | UKRR                                | PC          | SC          | UKRR                                  | PC          | SC          | UKRR                     | PC         | SC         |
|                     | N (%)                          | N (%)       | N (%)       | N (%)                               | N (%)       | N (%)       | N (%)                                 | N (%)       | N (%)       | N (%)                    | N (%)      | N (%)      |
| Total               | 22,815                         | 26,750      | 32,465      | 9,780                               | 13,985      | 16,780      | 13,035                                | 12,565      | 14,605      | 2,475                    | 2,880      | 8,730      |
| Age                 |                                |             |             |                                     |             |             |                                       |             |             |                          |            |            |
| 18-39               | 2,975 (13)                     | 3,655 (14)  | 4,040 (12)  | 790 (8)                             | 1,465 (10)  | 1,345 (8)   | 2,185 (17)                            | 2,155 (17)  | 2,455 (17)  | 250 (10)                 | 290 (10)   | 990 (11)   |
| 40-49               | 3,135 (14)                     | 3,645 (14)  | 4,125 (13)  | 865 (9)                             | 1,390 (10)  | 1,420 (8)   | 2,270 (17)                            | 2,220 (18)  | 2,530 (17)  | 270 (11)                 | 315 (11)   | 1,095 (13) |
| 50-59               | 5,335 (23)                     | 6,005 (22)  | 6,855 (21)  | 1,695 (17)                          | 2,530 (18)  | 2,630 (16)  | 3,640 (28)                            | 3,425 (27)  | 3,935 (27)  | 525 (21)                 | 550 (19)   | 1,835 (21) |
| 60-69               | 5,185 (23)                     | 5,895 (22)  | 7,370 (23)  | 2,190 (22)                          | 3,005 (21)  | 3,750 (22)  | 2,995 (23)                            | 2,845 (23)  | 3,385 (23)  | 570 (23)                 | 595 (21)   | 2,075 (24) |
| 70-79               | 4,255 (19)                     | 5,020 (19)  | 6,835 (21)  | 2,535 (26)                          | 3,335 (24)  | 4,715 (28)  | 1,720 (13)                            | 1,655 (13)  | 2,000 (14)  | 620 (25)                 | 695 (24)   | 2,015 (23) |
| 80+                 | 1,925 (8)                      | 2,535 (9)   | 3,235 (10)  | 1,705 (17)                          | 2,270 (16)  | 2,920 (17)  | 220 (2)                               | 265 (2)     | 300 (2)     | 230 (9)                  | 435 (15)   | 715 (8)    |
| Median (IQR), years | 59 (49,71)                     | 60 (48,71)  | 61 (49,72)  | 67 (55,77)                          | 65 (53,76)  | 68 (55,77)  | 55 (45,65)                            | 55 (45,65)  | 56 (45,65)  | 63 (52,73)               | 65 (52,75) | 62 (50,72) |
| Sex                 |                                |             |             |                                     |             |             |                                       |             |             |                          |            |            |
| Female              | 8,675 (38)                     | 10,730 (40) | 12,830 (40) | 3,615 (37)                          | 5,640 (40)  | 6,365 (38)  | 5,060 (39)                            | 5,005 (40)  | 6,035 (41)  | 835 (34)                 | 1,060 (37) | 3,165 (36) |
| Male                | 14,140 (62)                    | 16,020 (60) | 19,635 (60) | 6,165 (63)                          | 8,345 (60)  | 10,415 (62) | 7,975 (61)                            | 7,560 (60)  | 8,570 (59)  | 1,640 (66)               | 1,820 (63) | 5,565 (64) |
| Ethnicity           |                                |             |             |                                     |             |             |                                       |             |             |                          |            |            |
| White               | 18,205 (80)                    | 21,745 (81) | 26,755 (82) | 7,515 (77)                          | 11,360 (81) | 13,990 (83) | 10,690 (82)                           | 10,220 (81) | 11,950 (82) | 1,970 (80)               | 2,410 (84) | 7,330 (84) |
| Mixed               | 270 (1)                        | 310 (1)     | 365 (1)     | 145 (1)                             | 170 (1)     | 180 (1)     | 125 (1)                               | 140 (1)     | 160 (1)     | 30 (1)                   | 25 (1)     | 105 (1)    |
| South Asian         | 2,865 (13)                     | 2,995 (11)  | 3,520 (11)  | 1,355 (14)                          | 1,500 (11)  | 1,670 (10)  | 1,510 (12)                            | 1,475 (12)  | 1,700 (12)  | 315 (13)                 | 280 (10)   | 795 (9)    |
| Black               | 1,075 (5)                      | 1,125 (4)   | 1,280 (4)   | 610 (6)                             | 665 (5)     | 705 (4)     | 465 (4)                               | 450 (4)     | 510 (3)     | 110 (4)                  | 110 (4)    | 310 (4)    |
| Other               | 375 (2)                        | 410 (2)     | 450 (1)     | 145 (1)                             | 185 (1)     | 185 (1)     | 230 (2)                               | 225 (2)     | 245 (2)     | 30 (1)                   | 35 (1)     | 115 (1)    |
| Missing             | 25 (0)                         | 160 (1)     | 85 (0)      | 15 (0)                              | 105 (1)     | 50 (0)      | 10 (0)                                | 55 (0)      | 35 (0)      | ≤7 (0)                   | 10 (0)     | 75 (1)     |
| IMD quintile        |                                |             |             |                                     |             |             |                                       |             |             |                          |            |            |
| 1 - most deprived   | 5,495 (24)                     | 5,995 (22)  | 7,445 (23)  | 2,710 (28)                          | 3,490 (25)  | 4,235 (25)  | 2,560 (20)                            | 2,465 (20)  | 2,955 (20)  | 595 (24)                 | 690 (24)   | 2,045 (23) |
| 2                   | 4,880 (21)                     | 5,600 (21)  | 6,845 (21)  | 2,195 (22)                          | 2,985 (21)  | 3,615 (22)  | 2,680 (21)                            | 2,580 (21)  | 2,990 (20)  | 550 (22)                 | 625 (22)   | 1,865 (21) |
| 3                   | 4,710 (20)                     | 5,530 (21)  | 6,800 (21)  | 1,955 (20)                          | 2,825 (20)  | 3,475 (21)  | 2,750 (21)                            | 2,665 (21)  | 3,110 (21)  | 530 (21)                 | 600 (21)   | 1,860 (21) |
| 4                   | 4,070 (18)                     | 4,965 (19)  | 5,910 (18)  | 1,520 (16)                          | 2,455 (18)  | 2,870 (17)  | 2,550 (20)                            | 2,470 (20)  | 2,860 (20)  | 425 (17)                 | 490 (17)   | 1,570 (18) |
| 5 - least deprived  | 3,530 (15)                     | 4,245 (16)  | 4,960 (15)  | 1,250 (13)                          | 2,005 (14)  | 2,325 (14)  | 2,280 (17)                            | 2,195 (17)  | 2,460 (17)  | 325 (13)                 | 410 (14)   | 1,250 (14) |
| Missing             | 360 (2)                        | 420 (2)     | 510 (2)     | 150 (2)                             | 230 (2)     | 260 (2)     | 210 (2)                               | 190 (2)     | 235 (2)     | 45 (2)                   | 60 (2)     | 145 (2)    |

|                    |             |             |             |            |             |             |             |             |             |            |            |            |
|--------------------|-------------|-------------|-------------|------------|-------------|-------------|-------------|-------------|-------------|------------|------------|------------|
| Diabetes           | 8,770 (38)  | 9,510 (36)  | 12,285 (38) | 4,410 (45) | 5,410 (39)  | 7,480 (45)  | 4,360 (33)  | 4,045 (32)  | 4,450 (30)  | 1,195 (48) | 1,310 (45) | 3,165 (36) |
| Hypertension       | 19,610 (86) | 21,475 (80) | 24,810 (76) | 8,530 (87) | 11,020 (79) | 12,710 (76) | 11,080 (85) | 10,285 (82) | 11,195 (77) | 2,015 (81) | 2,235 (77) | 5,370 (61) |
| Region             |             |             |             |            |             |             |             |             |             |            |            |            |
| North East         | 1,130 (5)   | 1,270 (5)   | 1,750 (5)   | 525 (5)    | 665 (5)     | 910 (5)     | 605 (5)     | 605 (5)     | 830 (6)     | 120 (5)    | 130 (5)    | 440 (5)    |
| North West         | 1,925 (8)   | 2,315 (9)   | 2,760 (9)   | 745 (8)    | 1,200 (9)   | 1,580 (9)   | 1,180 (9)   | 1,095 (9)   | 1,040 (7)   | 200 (8)    | 245 (9)    | 680 (8)    |
| Yorkshire & Humber | 3,375 (15)  | 4,140 (15)  | 4,695 (14)  | 1,390 (14) | 2,355 (17)  | 2,075 (12)  | 1,985 (15)  | 1,745 (14)  | 2,460 (17)  | 325 (13)   | 450 (16)   | 1,300 (15) |
| East Midlands      | 3,970 (17)  | 4,705 (18)  | 5,660 (17)  | 1,690 (17) | 2,355 (17)  | 2,850 (17)  | 2,280 (18)  | 2,315 (18)  | 2,635 (18)  | 445 (18)   | 495 (17)   | 1,595 (18) |
| West Midlands      | 1,150 (5)   | 1,255 (5)   | 1,675 (5)   | 675 (7)    | 795 (6)     | 1,085 (6)   | 475 (4)     | 460 (4)     | 540 (4)     | 110 (4)    | 145 (5)    | 470 (5)    |
| East of England    | 5,105 (22)  | 5,900 (22)  | 7,145 (22)  | 2,145 (22) | 2,925 (21)  | 3,870 (23)  | 2,960 (23)  | 2,910 (23)  | 3,000 (21)  | 575 (23)   | 640 (22)   | 2,015 (23) |
| London             | 1,770 (8)   | 1,925 (7)   | 2,270 (7)   | 840 (9)    | 940 (7)     | 1,215 (7)   | 930 (7)     | 975 (8)     | 905 (6)     | 190 (8)    | 170 (6)    | 565 (6)    |
| South East         | 1,325 (6)   | 1,620 (6)   | 2,100 (6)   | 545 (6)    | 890 (6)     | 965 (6)     | 780 (6)     | 715 (6)     | 1,095 (8)   | 170 (7)    | 175 (6)    | 590 (7)    |
| South West         | 3,060 (13)  | 3,605 (13)  | 4,385 (14)  | 1,230 (13) | 1,850 (13)  | 2,215 (13)  | 1,830 (14)  | 1,740 (14)  | 2,085 (14)  | 320 (13)   | 420 (15)   | 1,050 (12) |
| Missing            | 15 (0)      | ≤7 (0)      | 20 (0)      | ≤7 (0)     | ≤7 (0)      | 10 (0)      | ≤7 (0)      | ≤7 (0)      | 10 (0)      | 0 (0)      | 0 (0)      | 0 (0)      |



Table S4 Agreement by demographic characteristics for prevalent patients receiving KRT at the start of 2020

| Category           | UKRR+PC+SC  | UKRR+PC   | UKRR-SC   | PC+SC     | UKRR only | PC only    | SC only    |
|--------------------|-------------|-----------|-----------|-----------|-----------|------------|------------|
|                    | N (%)       | N (%)     | N (%)     | N (%)     | N (%)     | N (%)      | N (%)      |
| Age                |             |           |           |           |           |            |            |
| 18-39              | 2,555 (51)  | 265 (5)   | 145 (3)   | 145 (3)   | 0 (0)     | 685 (14)   | 1,195 (24) |
| 40-49              | 2,640 (53)  | 320 (6)   | 160 (3)   | 170 (3)   | 15 (0)    | 510 (10)   | 1,155 (23) |
| 50-59              | 4,515 (56)  | 475 (6)   | 325 (4)   | 250 (3)   | 25 (0)    | 765 (9)    | 1,765 (22) |
| 60-69              | 4,360 (51)  | 360 (4)   | 430 (5)   | 345 (4)   | 35 (0)    | 830 (10)   | 2,235 (26) |
| 70-79              | 3,550 (45)  | 175 (2)   | 505 (6)   | 385 (5)   | 30 (0)    | 915 (11)   | 2,400 (30) |
| 80+                | 1,495 (36)  | 90 (2)    | 315 (8)   | 200 (5)   | 25 (1)    | 750 (18)   | 1,225 (30) |
| Sex                |             |           |           |           |           |            |            |
| Female             | 7,405 (48)  | 560 (4)   | 665 (4)   | 630 (4)   | 40 (0)    | 2,140 (14) | 4,125 (27) |
| Male               | 11,710 (51) | 1,125 (5) | 1,205 (5) | 865 (4)   | 95 (0)    | 2,320 (10) | 5,850 (25) |
| Ethnicity          |             |           |           |           |           |            |            |
| White              | 15,235 (47) | 1,420 (4) | 1,435 (4) | 1,280 (4) | 115 (0)   | 3,645 (11) | 8,740 (28) |
| Mixed              | 240 (56)    | 10 (2)    | 15 (4)    | 20 (5)    | 0 (0)     | 50 (11)    | 100 (21)   |
| South Asian        | 2,435 (61)  | 135 (3)   | 280 (7)   | 125 (3)   | 15 (0)    | 280 (7)    | 680 (17)   |
| Black              | 885 (60)    | 80 (5)    | 105 (7)   | 50 (3)    | ≤7 (0)    | 95 (7)     | 230 (16)   |
| Other              | 310 (58)    | 35 (7)    | 25 (5)    | 20 (4)    | ≤7 (0)    | 60 (10)    | 115 (19)   |
| IMD quintile       |             |           |           |           |           |            |            |
| 1 - most deprived  | 4,385 (50)  | 305 (3)   | 550 (6)   | 345 (4)   | 35 (0)    | 970 (11)   | 2,165 (25) |
| 2                  | 4,090 (51)  | 320 (4)   | 435 (5)   | 315 (4)   | 30 (0)    | 875 (11)   | 2,005 (25) |
| 3                  | 3,970 (49)  | 360 (4)   | 340 (4)   | 345 (4)   | 35 (0)    | 860 (11)   | 2,140 (27) |
| 4                  | 3,440 (48)  | 345 (5)   | 270 (4)   | 265 (4)   | 20 (0)    | 915 (13)   | 1,940 (27) |
| 5 - least deprived | 2,945 (49)  | 335 (6)   | 235 (4)   | 215 (4)   | 20 (0)    | 750 (12)   | 1,565 (26) |
| Diabetes           | 7,305 (51)  | 490 (3)   | 920 (6)   | 570 (4)   | 55 (0)    | 1,145 (8)  | 3,845 (27) |
| Hypertension       | 16,530 (57) | 1,435 (5) | 1,535 (5) | 1070 (4)  | 115 (0)   | 2,440 (8)  | 5,675 (20) |
| Region             |             |           |           |           |           |            |            |
| North East         | 985 (50)    | 30 (2)    | 110 (6)   | 90 (5)    | ≤7 (0)    | 175 (9)    | 570 (29)   |
| North West         | 1,545 (45)  | 220 (6)   | 145 (4)   | 125 (4)   | 10 (0)    | 425 (12)   | 940 (28)   |
| Yorkshire & Humber | 2,955 (52)  | 200 (4)   | 200 (4)   | 205 (4)   | 15 (0)    | 780 (14)   | 1,330 (23) |
| East Midlands      | 3,340 (49)  | 320 (5)   | 285 (4)   | 270 (4)   | 25 (0)    | 775 (11)   | 1,765 (26) |
| West Midlands      | 935 (49)    | 70 (4)    | 135 (7)   | 80 (4)    | ≤7 (0)    | 170 (9)    | 520 (27)   |
| East of England    | 4,090 (47)  | 480 (6)   | 490 (6)   | 360 (4)   | 40 (0)    | 965 (11)   | 2,195 (25) |

|            |            |         |         |         |        |          |            |
|------------|------------|---------|---------|---------|--------|----------|------------|
| London     | 1,435 (53) | 135 (5) | 185 (7) | 70 (3)  | 10 (0) | 280 (10) | 580 (22)   |
| South East | 1,160 (47) | 60 (2)  | 95 (4)  | 110 (4) | 10 (0) | 285 (12) | 735 (30)   |
| South West | 2,660 (52) | 170 (3) | 220 (4) | 180 (3) | 10 (0) | 590 (11) | 1,325 (26) |

Table S5 Sensitivity and positive predictive value of primary and secondary care definitions (taking UKRR as the gold standard) by demographic characteristics, for prevalent dialysis and transplant cohorts at the start of 2020

|                    | Dialysis recipient at the start of 2020 |              |                      |              | Transplant recipient at the start of 2020 |              |                      |              |
|--------------------|-----------------------------------------|--------------|----------------------|--------------|-------------------------------------------|--------------|----------------------|--------------|
| Category           | Primary care                            |              | Secondary care       |              | Primary care                              |              | Secondary care       |              |
|                    | Sensitivity (95% CI)                    | PPV (95% CI) | Sensitivity (95% CI) | PPV (95% CI) | Sensitivity (95% CI)                      | PPV (95% CI) | Sensitivity (95% CI) | PPV (95% CI) |
| All patients       | 77 (76,78)                              | 54 (53,55)   | 84 (83,85)           | 49 (48,50)   | 84 (83,85)                                | 87 (86,88)   | 84 (83,85)           | 75 (74,76)   |
| Age                |                                         |              |                      |              |                                           |              |                      |              |
| 18-39              | 75 (72,78)                              | 40 (37,43)   | 71 (68,74)           | 41 (37,45)   | 86 (85,87)                                | 87 (86,88)   | 81 (79,83)           | 73 (71,75)   |
| 40-49              | 74 (71,77)                              | 46 (43,49)   | 73 (70,76)           | 45 (41,49)   | 85 (84,86)                                | 87 (86,88)   | 83 (81,85)           | 74 (72,76)   |
| 50-59              | 76 (74,78)                              | 51 (49,53)   | 78 (76,80)           | 50 (47,53)   | 84 (83,85)                                | 89 (88,90)   | 83 (82,84)           | 77 (76,78)   |
| 60-69              | 76 (74,78)                              | 56 (54,58)   | 83 (81,85)           | 49 (47,51)   | 84 (83,85)                                | 88 (87,89)   | 85 (84,86)           | 76 (74,78)   |
| 70-79              | 78 (76,80)                              | 59 (57,61)   | 91 (90,92)           | 49 (47,51)   | 83 (81,85)                                | 86 (84,88)   | 90 (89,91)           | 77 (75,79)   |
| 80+                | 79 (77,81)                              | 60 (58,62)   | 94 (93,95)           | 55 (53,57)   | 84 (79,89)                                | 70 (64,76)   | 86 (81,91)           | 63 (56,70)   |
| Sex                |                                         |              |                      |              |                                           |              |                      |              |
| Female             | 78 (77,79)                              | 50 (49,51)   | 84 (83,85)           | 48 (46,50)   | 85 (84,86)                                | 86 (85,87)   | 87 (86,88)           | 73 (72,74)   |
| Male               | 76 (75,77)                              | 56 (55,57)   | 84 (83,85)           | 50 (49,51)   | 84 (83,85)                                | 88 (87,89)   | 83 (82,84)           | 77 (76,78)   |
| Ethnicity          |                                         |              |                      |              |                                           |              |                      |              |
| White              | 77 (76,78)                              | 51 (50,52)   | 85 (84,86)           | 46 (45,47)   | 84 (83,85)                                | 88 (87,89)   | 84 (83,85)           | 75 (74,76)   |
| Mixed              | 79 (72,86)                              | 68 (61,75)   | 76 (69,83)           | 61 (52,70)   | 92 (87,97)                                | 79 (72,86)   | 88 (82,94)           | 66 (57,75)   |
| South Asian        | 74 (72,76)                              | 66 (64,68)   | 83 (81,85)           | 67 (64,70)   | 83 (81,85)                                | 85 (83,87)   | 87 (85,89)           | 77 (75,79)   |
| Black              | 77 (74,80)                              | 71 (68,74)   | 81 (78,84)           | 70 (66,74)   | 81 (77,85)                                | 84 (81,87)   | 82 (79,85)           | 75 (71,79)   |
| Other              | 79 (72,86)                              | 61 (54,68)   | 83 (77,89)           | 63 (54,72)   | 83 (78,88)                                | 86 (81,91)   | 83 (78,88)           | 78 (72,84)   |
| IMD quintile       |                                         |              |                      |              |                                           |              |                      |              |
| 1 - most deprived  | 75 (73,77)                              | 58 (56,60)   | 84 (83,85)           | 54 (52,56)   | 83 (82,84)                                | 86 (85,87)   | 86 (85,87)           | 74 (72,76)   |
| 2                  | 77 (75,79)                              | 56 (54,58)   | 85 (84,86)           | 51 (49,53)   | 84 (83,85)                                | 87 (86,88)   | 85 (84,86)           | 76 (74,78)   |
| 3                  | 77 (75,79)                              | 53 (51,55)   | 83 (81,85)           | 47 (45,49)   | 84 (83,85)                                | 87 (86,88)   | 85 (84,86)           | 75 (73,77)   |
| 4                  | 79 (77,81)                              | 49 (47,51)   | 85 (83,87)           | 45 (42,48)   | 85 (84,86)                                | 88 (87,89)   | 84 (83,85)           | 74 (72,76)   |
| 5 - least deprived | 78 (76,80)                              | 48 (46,50)   | 84 (82,86)           | 45 (42,48)   | 86 (85,87)                                | 89 (88,90)   | 82 (80,84)           | 76 (74,78)   |
| Diabetes           | 76 (75,77)                              | 62 (61,63)   | 88 (87,89)           | 52 (50,54)   | 85 (84,86)                                | 91 (90,92)   | 86 (85,87)           | 84 (83,85)   |
| Hypertension       | 77 (76,78)                              | 60 (59,61)   | 84 (83,85)           | 56 (55,57)   | 84 (83,85)                                | 91 (90,92)   | 85 (84,86)           | 84 (83,85)   |
| Region             |                                         |              |                      |              |                                           |              |                      |              |
| North East         | 73 (69,77)                              | 58 (54,62)   | 88 (85,91)           | 51 (46,56)   | 91 (89,93)                                | 91 (89,93)   | 96 (94,98)           | 70 (66,74)   |
| North West         | 77 (74,80)                              | 48 (45,51)   | 88 (86,90)           | 42 (38,46)   | 83 (81,85)                                | 89 (87,91)   | 74 (72,76)           | 83 (81,85)   |
| Yorkshire & Humber | 81 (79,83)                              | 48 (46,50)   | 77 (75,79)           | 51 (48,54)   | 77 (75,79)                                | 88 (86,90)   | 89 (88,90)           | 72 (70,74)   |
| East Midlands      | 79 (77,81)                              | 57 (55,59)   | 82 (80,84)           | 49 (46,52)   | 90 (89,91)                                | 89 (88,90)   | 84 (82,86)           | 73 (71,75)   |
| West Midlands      | 75 (72,78)                              | 63 (60,66)   | 90 (88,92)           | 56 (52,60)   | 78 (74,82)                                | 82 (78,86)   | 83 (80,86)           | 73 (69,77)   |
| East of England    | 73 (71,75)                              | 54 (52,56)   | 85 (83,87)           | 47 (45,49)   | 85 (84,86)                                | 86 (85,87)   | 80 (79,81)           | 79 (77,81)   |
| London             | 74 (71,77)                              | 65 (62,68)   | 85 (83,87)           | 58 (54,62)   | 84 (82,86)                                | 80 (77,83)   | 80 (77,83)           | 81 (78,84)   |
| South East         | 79 (76,82)                              | 49 (46,52)   | 75 (71,79)           | 42 (37,47)   | 81 (78,84)                                | 88 (86,90)   | 93 (91,95)           | 66 (63,69)   |
| South West         | 79 (77,81)                              | 53 (51,55)   | 91 (89,93)           | 50 (47,53)   | 85 (83,87)                                | 90 (89,91)   | 88 (87,89)           | 78 (76,80)   |

Table S6 Sensitivity and positive predictive value for 2020 incident cohorts

|                      | Starting KRT during 2020 |            |            |
|----------------------|--------------------------|------------|------------|
|                      | Any KRT                  | Dialysis   | Transplant |
| Primary care         |                          |            |            |
| Sensitivity (95% CI) | 52 (50,54)               | 49 (47,51) | 79 (73,85) |
| PPV (95% CI)         | 45 (43,47)               | 44 (42,46) | 38 (33,43) |
| Secondary care       |                          |            |            |
| Sensitivity (95% CI) | 68 (66,70)               | 65 (63,67) | 42 (34,50) |
| PPV (95% CI)         | 19 (17,21)               | 22 (20,24) | 3 (0,7)    |

Figure S1 Most common primary/secondary care codes for people incident/prevalent to KRT in primary/secondary care data, but who were not in the UKRR, and the frequency amongst people who are also in the UKRR for comparison. All n rounded to the nearest 5 and n ≤ 7 not shown.

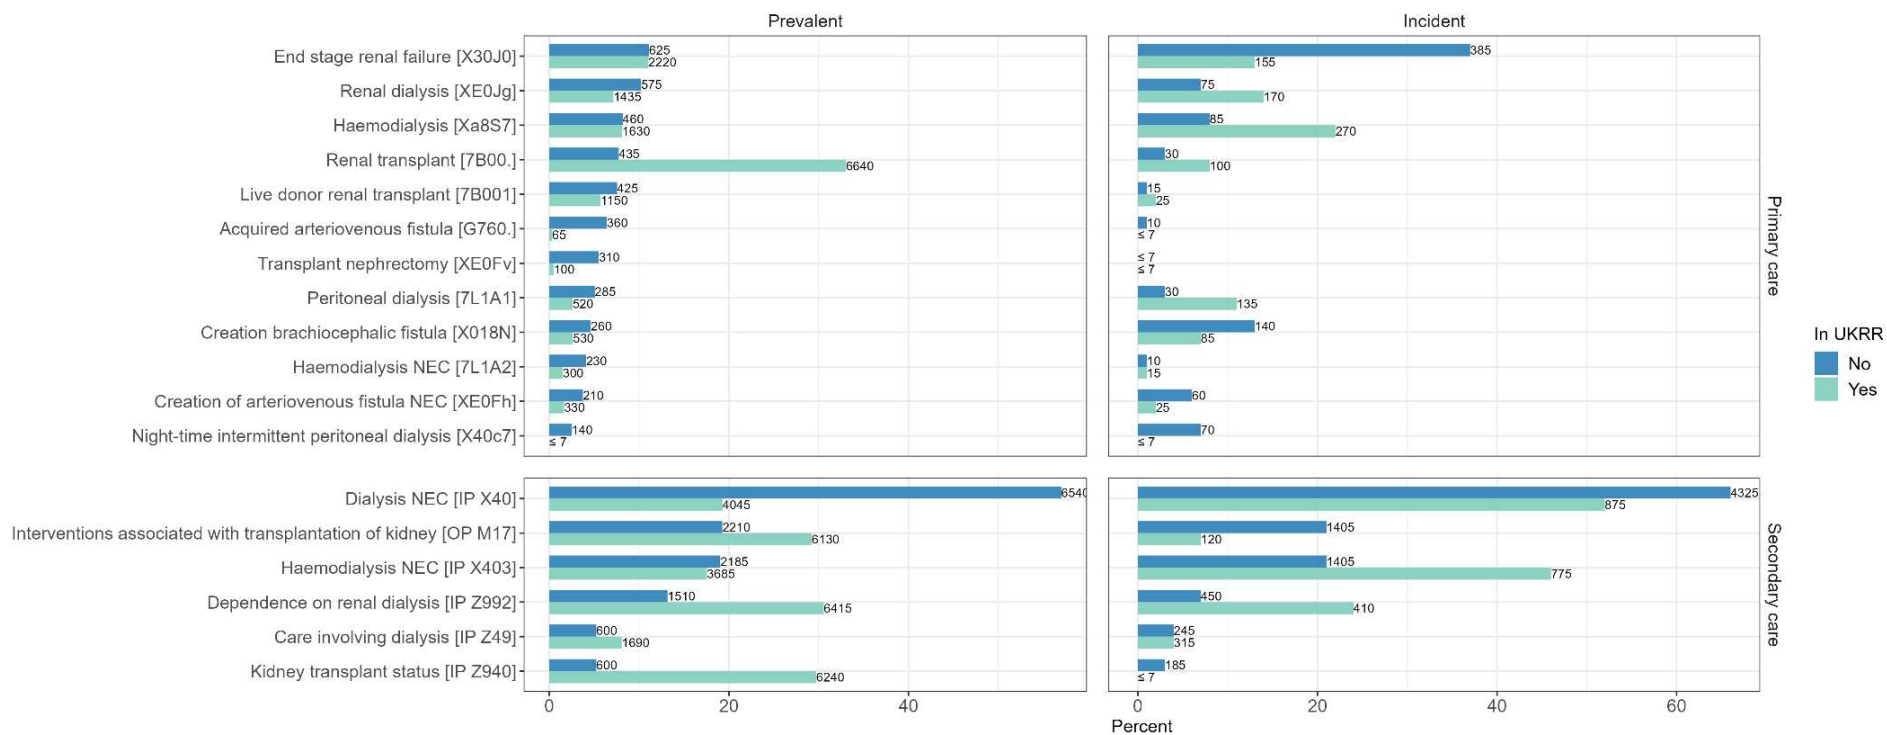

Figure S2 Euler diagrams showing agreement for under 18 prevalent cohorts on 1<sup>st</sup> January 2020 for a) all KRT, b) dialysis and c) transplant. All n rounded to the nearest 5. Values  $\leq 7$  are shown as 7.

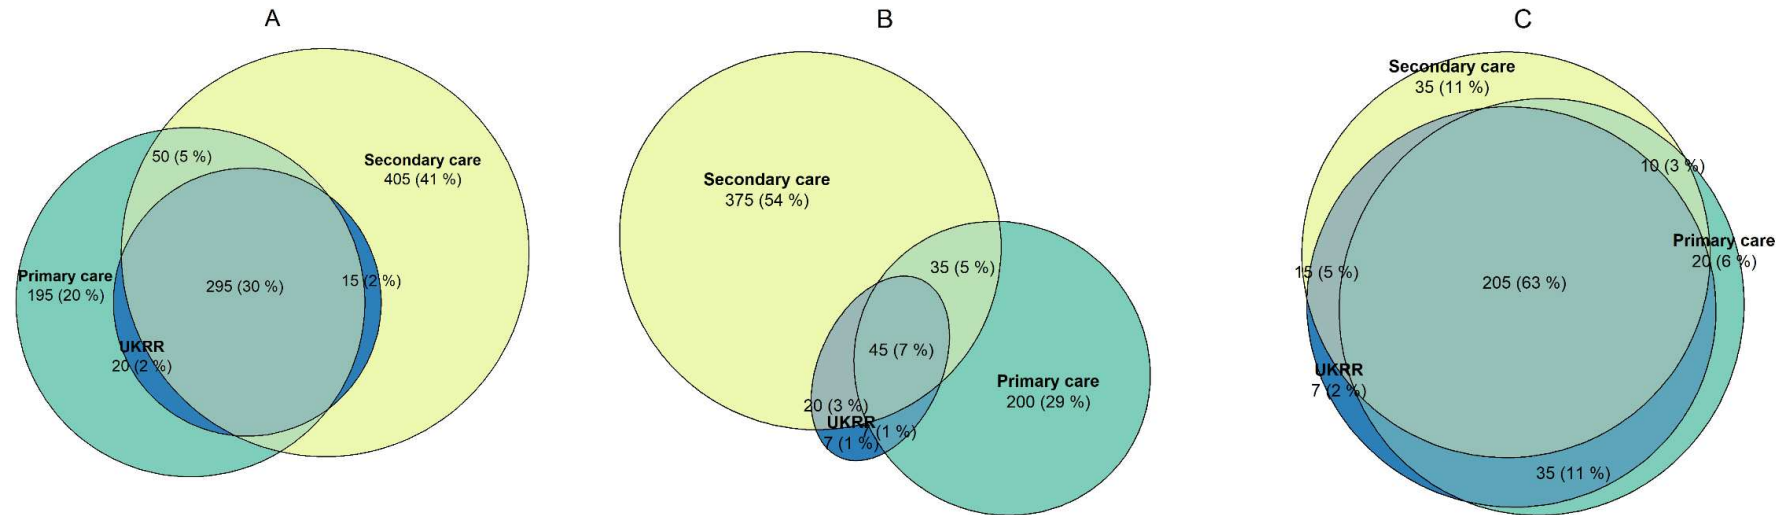

Figure S3 Euler diagrams showing agreement for adult prevalent cohorts on a) 1<sup>st</sup> January 2021 and b) 1<sup>st</sup> January 2022. All n rounded to the nearest 5.

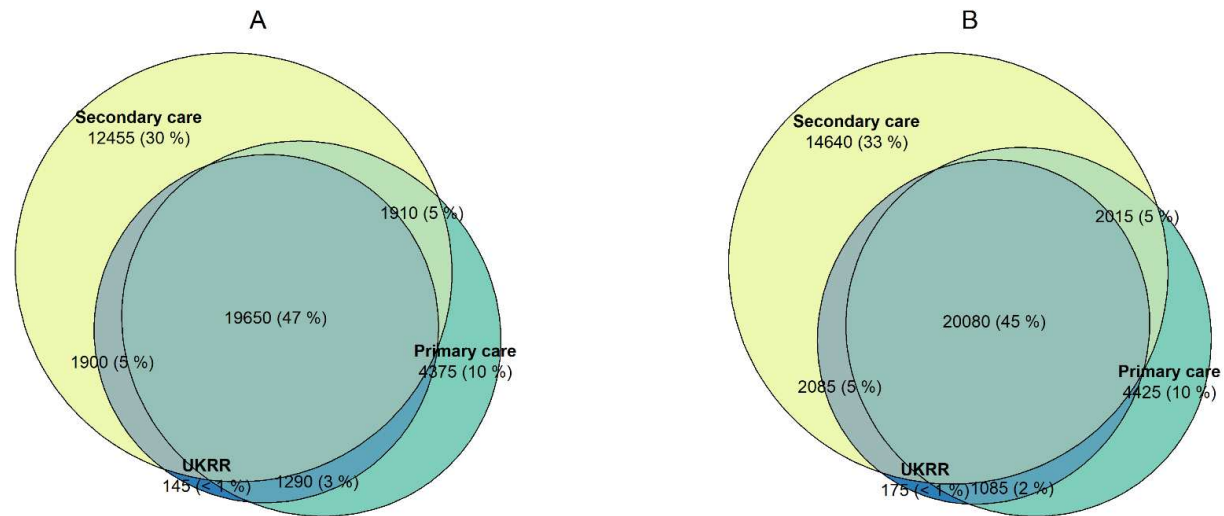

Supplement: bmjmed-2023-000807supp001.pdf [file bmjmed-2023-000807supp001.pdf]
